# Supplementary material for: Purging due to self-fertilization does not prevent accumulation of expansion load
Source: PubMed Central journal article supplement (PMC10501686; doi:10.1371/journal.pgen.1010883), 2023-09-01
Supplement: pgen.1010883.s003.pdf [file pgen.1010883.s003.pdf]

|    | Abruzzo |      |      |      | Apuan Alps |      |      |      |      | French Alps |      |      |      | Swiss Alps |      |      |      |
|----|---------|------|------|------|------------|------|------|------|------|-------------|------|------|------|------------|------|------|------|
|    | Am      | Gs   | Gz   | Mv   | Ca         | Gf   | Po   | Se   | St   | Br          | Cc   | Ga   | La   | Es         | Ma   | Pa   | Pi   |
| Am | -       | -    | -    | -    | 1356       | 1380 | 1083 | 977  | 1077 | 1968        | 1447 | 1661 | 2013 | 1915       | 2047 | 1829 | 1997 |
| Gs | -       | -    | -    | -    | 1341       | 1307 | 1111 | 1001 | 1216 | 2134        | 1668 | 1900 | 2137 | 2063       | 2180 | 2014 | 2169 |
| Gz | -       | -    | -    | -    | 1336       | 1409 | 1058 | 1070 | 1002 | 1921        | 1395 | 1609 | 1979 | 1950       | 2083 | 1858 | 2031 |
| Mv | -       | -    | -    | -    | 1306       | 1299 | 1034 | 920  | 1057 | 2079        | 1496 | 1733 | 2117 | 1980       | 2157 | 1885 | 2089 |
| Ca | 1356    | 1341 | 1336 | 1306 | -          | -    | -    | -    | -    | 2241        | 1947 | 2248 | 2427 | 2442       | 2580 | 2521 | 2595 |
| Gf | 1380    | 1307 | 1409 | 1299 | -          | -    | -    | -    | -    | 2364        | 2079 | 2434 | 2505 | 2557       | 2669 | 2640 | 2691 |
| Po | 1083    | 1111 | 1058 | 1034 | -          | -    | -    | -    | -    | 2275        | 1705 | 1997 | 2345 | 2320       | 2484 | 2262 | 2429 |
| Se | 977     | 1001 | 1070 | 920  | -          | -    | -    | -    | -    | 2240        | 1746 | 2045 | 2295 | 2226       | 2343 | 2214 | 2363 |
| St | 1077    | 1216 | 1002 | 1057 | -          | -    | -    | -    | -    | 2025        | 1550 | 1790 | 2161 | 2180       | 2315 | 2104 | 2253 |
| Br | 1968    | 2134 | 1921 | 2079 | 2241       | 2364 | 2275 | 2240 | 2025 | -           | -    | -    | -    | 520        | 447  | 1125 | 466  |
| Cc | 1447    | 1668 | 1395 | 1496 | 1947       | 2079 | 1705 | 1746 | 1550 | -           | -    | -    | -    | 506        | 524  | 935  | 538  |
| Ga | 1661    | 1900 | 1609 | 1733 | 2248       | 2434 | 1997 | 2045 | 1790 | -           | -    | -    | -    | 687        | 626  | 718  | 679  |
| La | 2013    | 2137 | 1979 | 2117 | 2427       | 2505 | 2345 | 2295 | 2161 | -           | -    | -    | -    | 547        | 402  | 881  | 441  |
| Es | 1915    | 2063 | 1950 | 1980 | 2442       | 2557 | 2320 | 2226 | 2180 | 520         | 506  | 687  | 547  | -          | -    | -    | -    |
| Ma | 2047    | 2180 | 2083 | 2157 | 2580       | 2669 | 2484 | 2343 | 2315 | 447         | 524  | 626  | 402  | -          | -    | -    | -    |
| Pa | 1829    | 2014 | 1858 | 1885 | 2521       | 2640 | 2262 | 2214 | 2104 | 1125        | 935  | 718  | 881  | -          | -    | -    | -    |
| Pi | 1997    | 2169 | 2031 | 2089 | 2595       | 2691 | 2429 | 2363 | 2253 | 466         | 538  | 679  | 441  | -          | -    | -    | -    |
