# Supplementary material for: Purging due to self-fertilization does not prevent accumulation of expansion load
Source: PubMed Central journal article supplement (PMC10501686; doi:10.1371/journal.pgen.1010883), 2023-09-01
Supplement: pgen.1010883.s008.pdf [file pgen.1010883.s008.pdf]

A

## DFE shifted to weaker effects

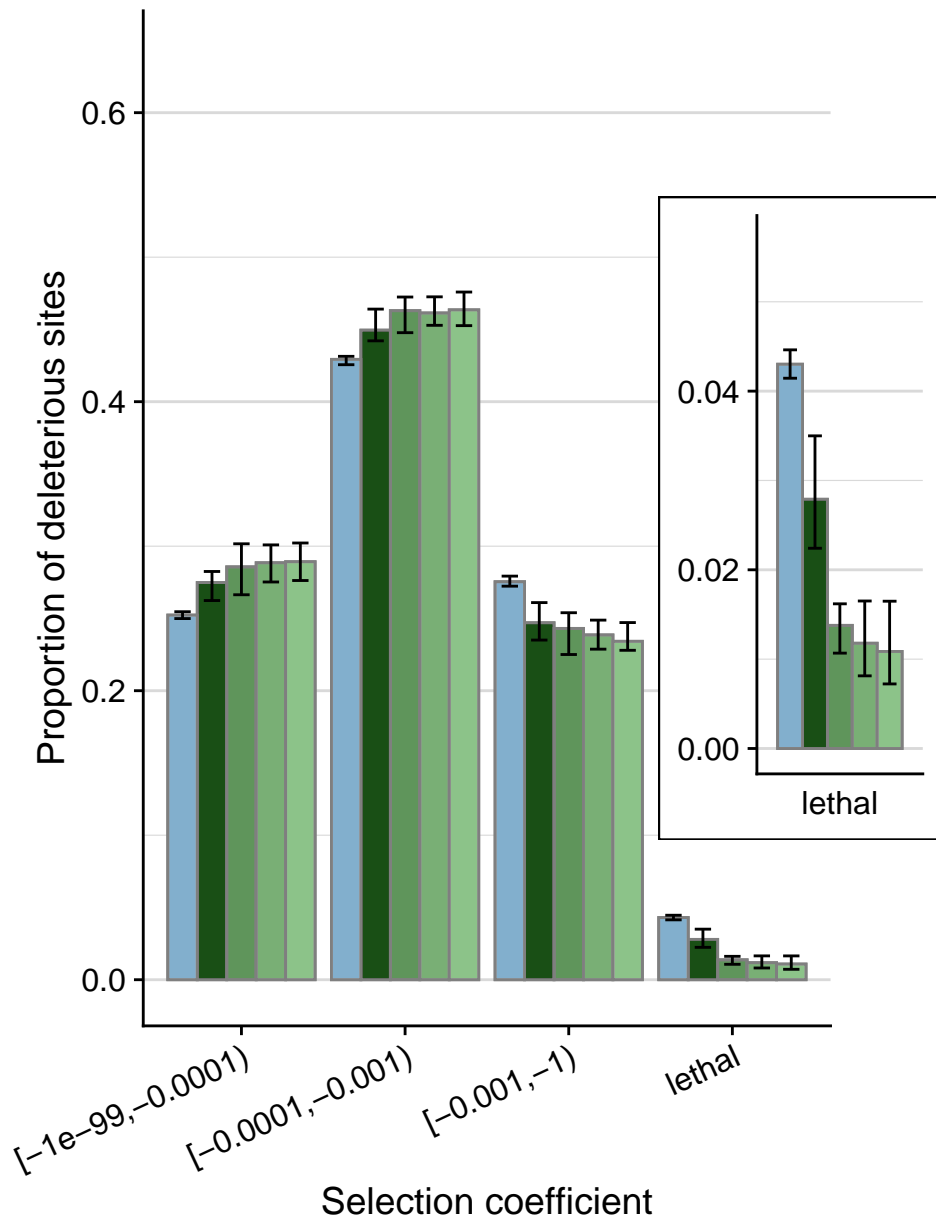

B

## DFE shifted to stronger effects

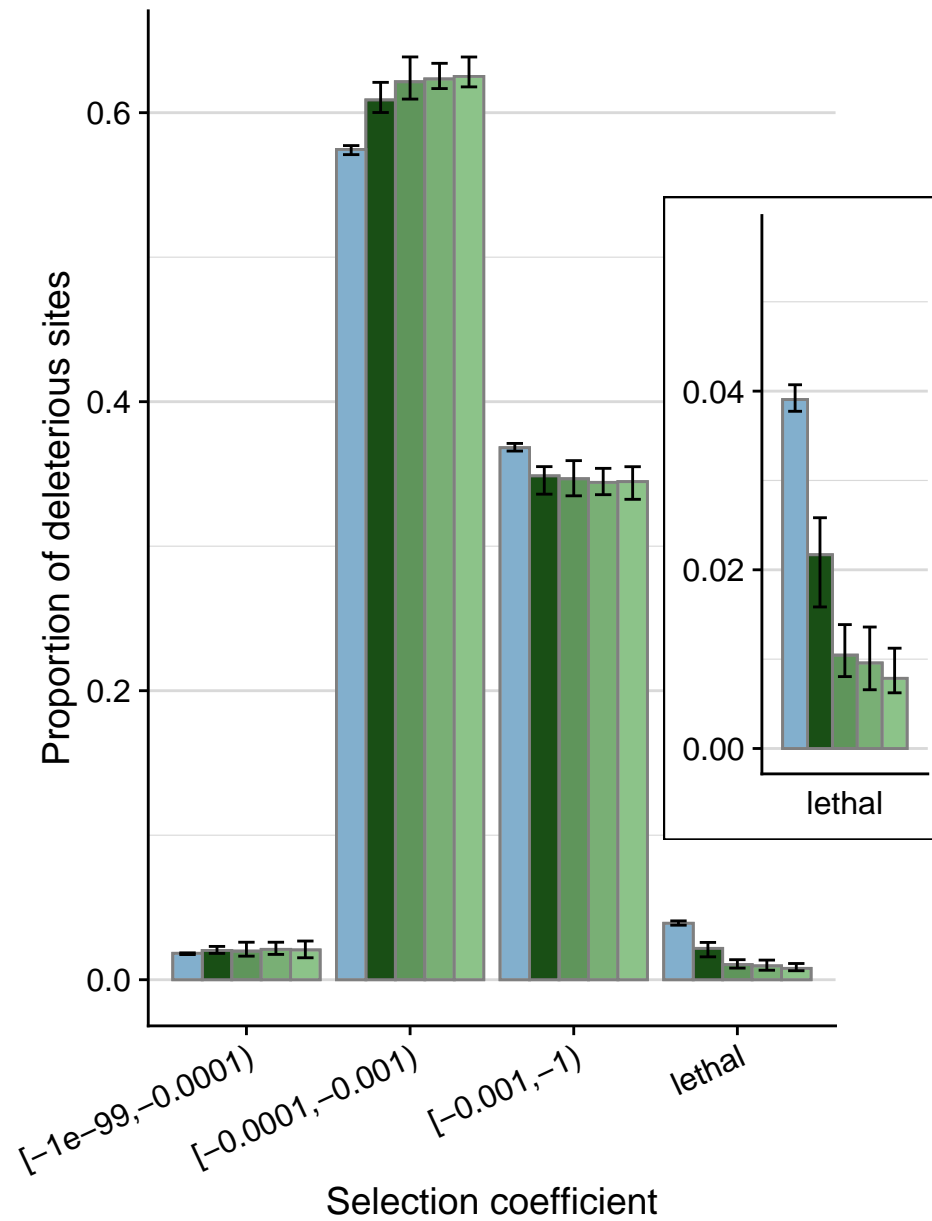

C

## non-lethal mutations are additive

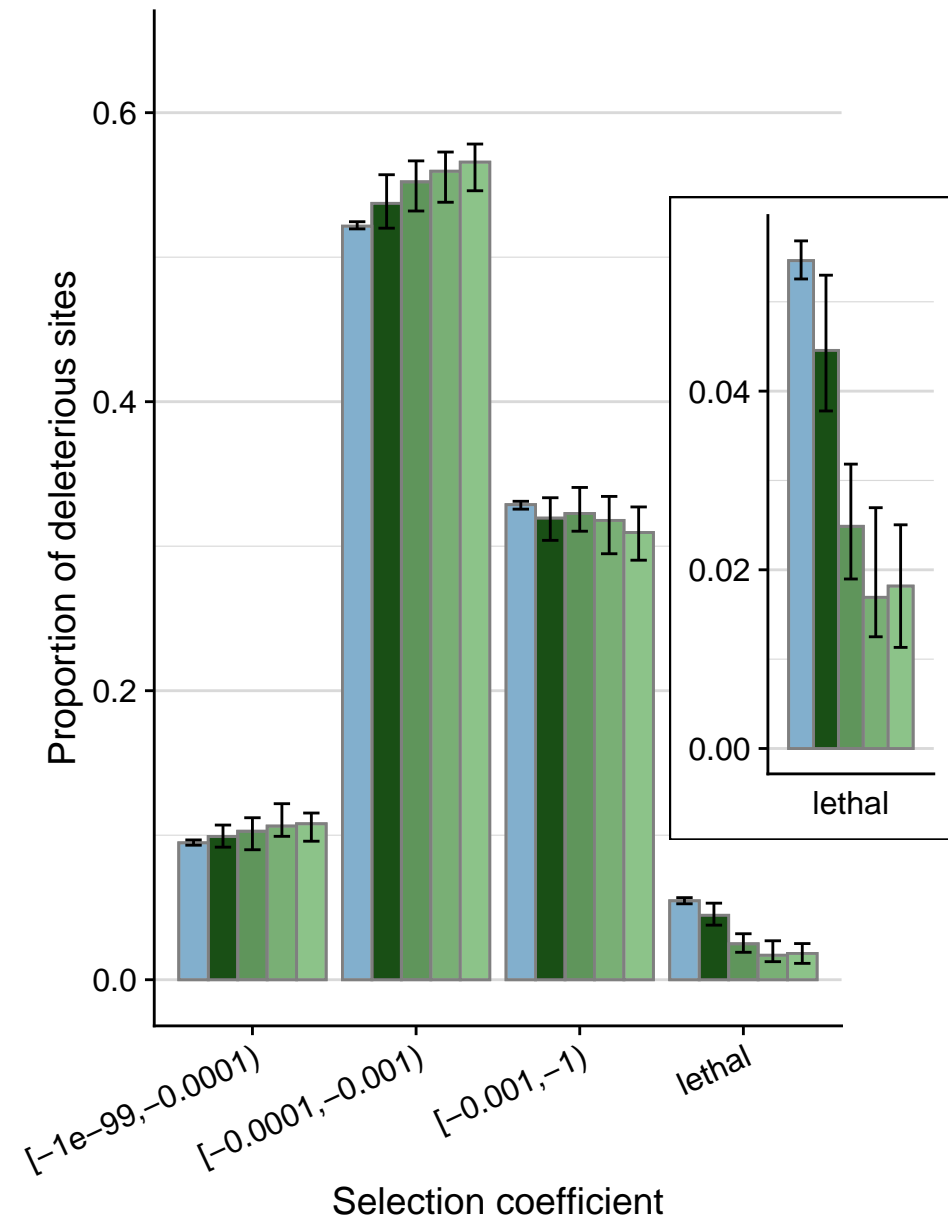

Core

outcrossing

Edge

outcrossing

95% selfing

50% selfing

100% selfing
