# Supplementary material for: Purging due to self-fertilization does not prevent accumulation of expansion load
Source: PubMed Central journal article supplement (PMC10501686; doi:10.1371/journal.pgen.1010883), 2023-09-01

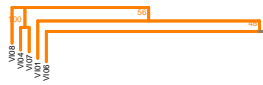

## Region

- Greece
- Abruzzo
- Apuan
- France
- Switzerland

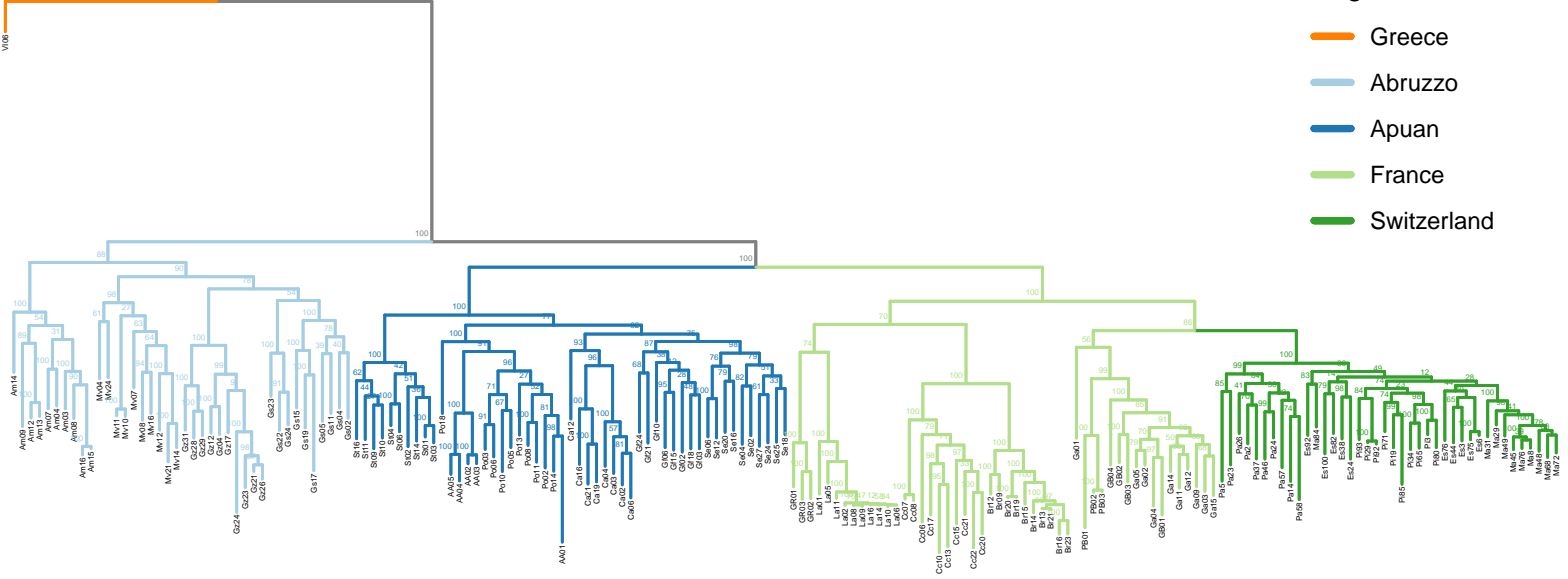

Supplement: pgen.1010883.s010.pdf [file pgen.1010883.s010.pdf]
