# Supplementary material for: Purging due to self-fertilization does not prevent accumulation of expansion load
Source: PubMed Central journal article supplement (PMC10501686; doi:10.1371/journal.pgen.1010883), 2023-09-01

Abruzzo

Apuan Alps

French Alps

Swiss Alps

920-1409

1395-2137

1829-2180

1550-2505

2104-2691

402-1125

**Split times**  
between regions  
(generations)

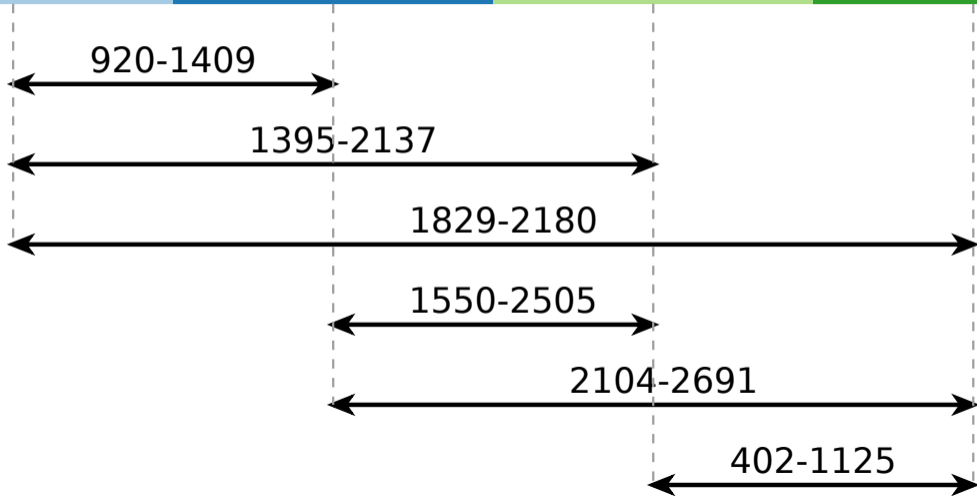

Supplement: pgen.1010883.s011.pdf [file pgen.1010883.s011.pdf]
