# Supplementary material for: Purging due to self-fertilization does not prevent accumulation of expansion load
Source: PubMed Central journal article supplement (PMC10501686; doi:10.1371/journal.pgen.1010883), 2023-09-01

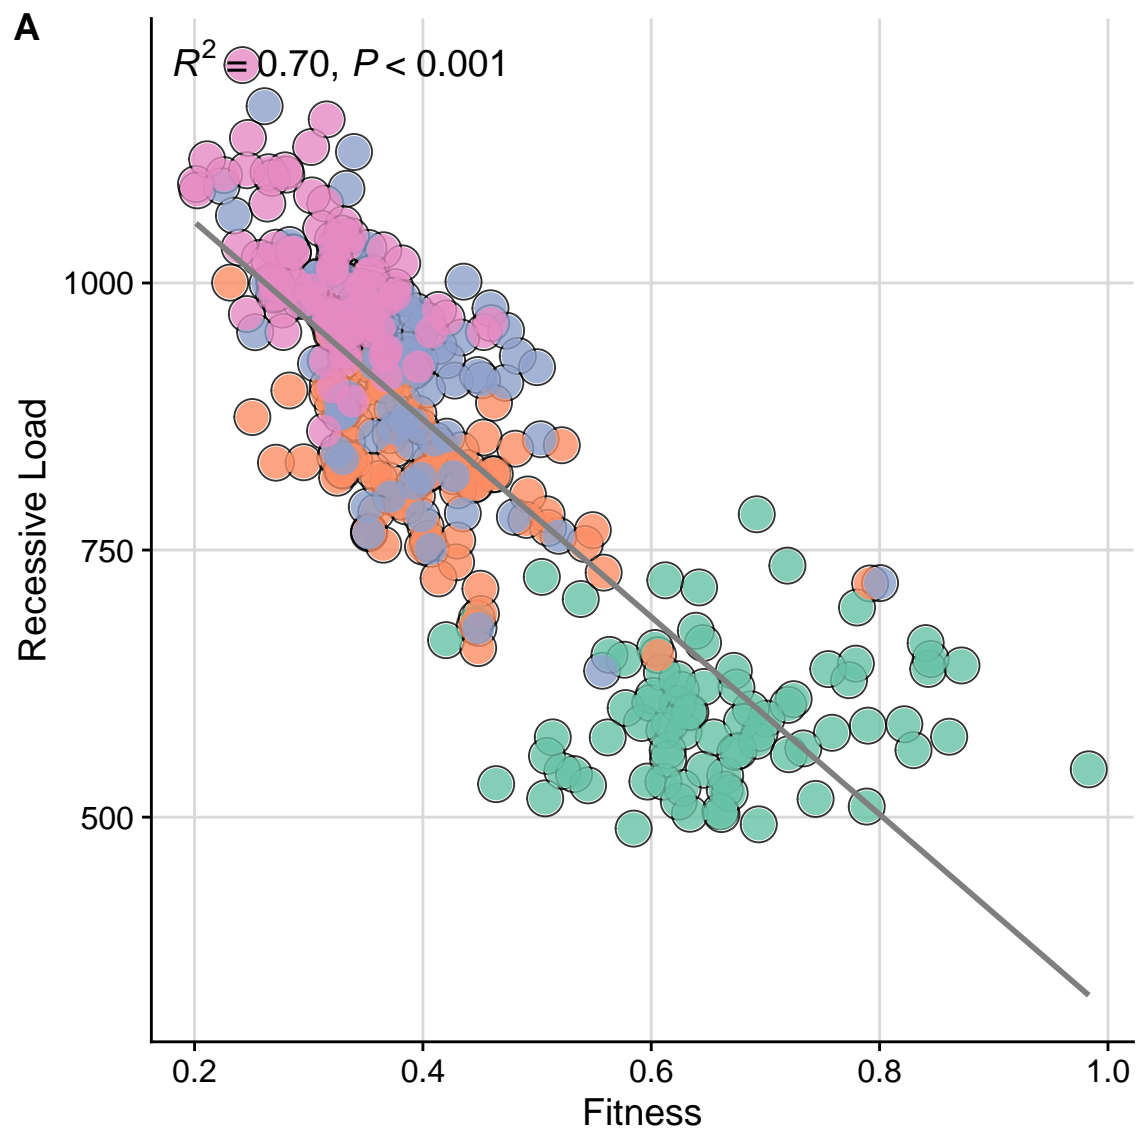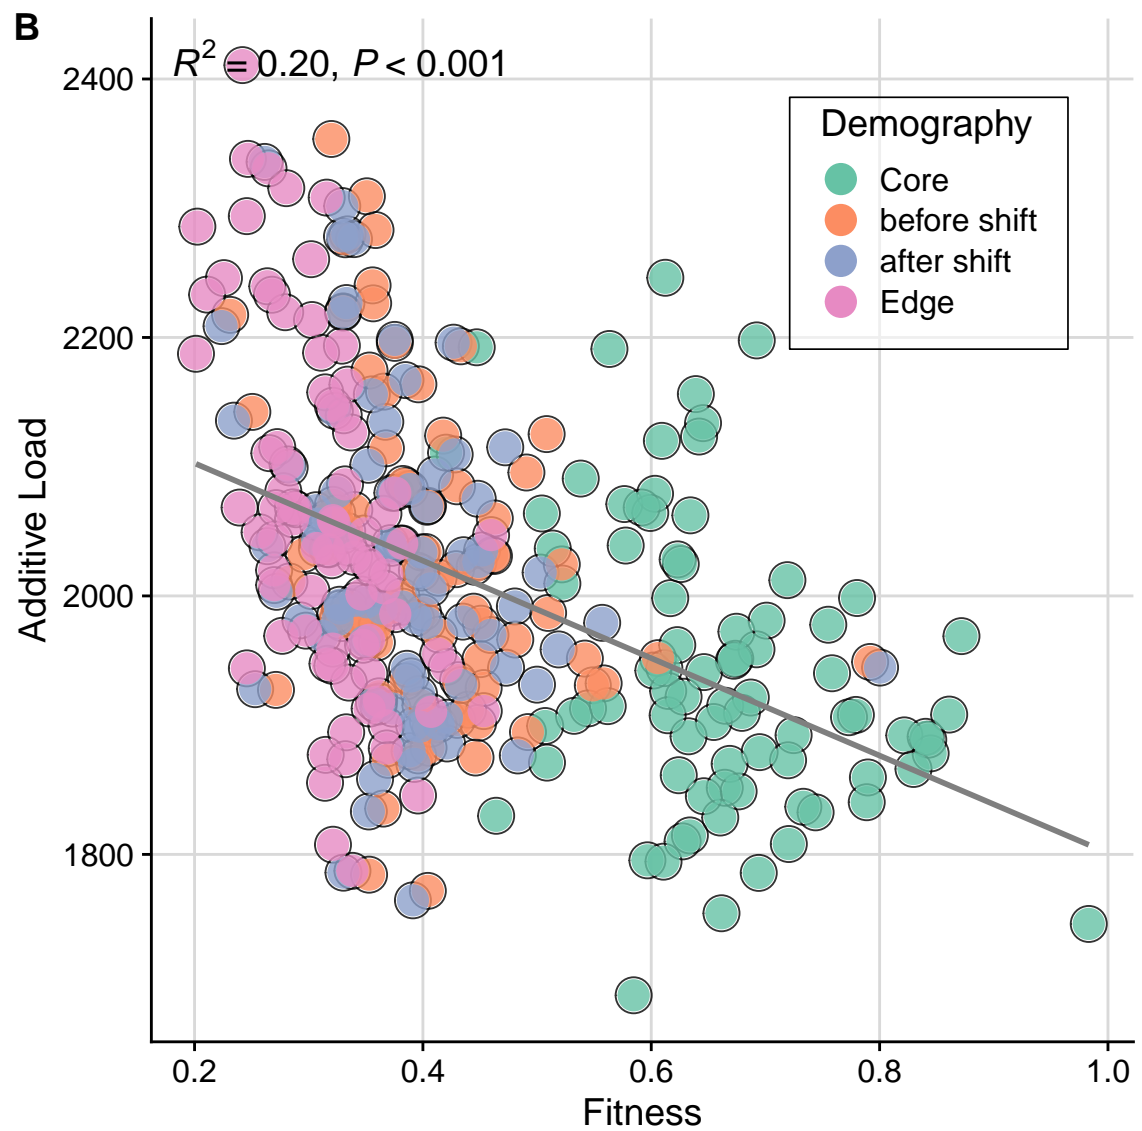

Supplement: pgen.1010883.s014.pdf [file pgen.1010883.s014.pdf]
